# Supplementary material for: Comparative Y-chromosome analysis among Cypriots in the context of historical events and migrations
Source: PLoS One. 2021 Aug 23;16(8):e0255140. doi: 10.1371/journal.pone.0255140 (PMC8382168; doi:10.1371/journal.pone.0255140)
Supplement: S6 Table — (XLSX) [file pone.0255140.s007.xlsx]

## Sheet: Sheet1
Population	Reference
Aegean Region, Turkey [Turkish]	YA004114
Afghanistan	YA003842, YA003701, YA003702, YA003703
Albania [Albanian]	YA003096
Assiut, Egypt [Egyptian]	YA003400
Azerbaijan [Azerbaijani]	YA004693
Bagandu, Central African Republic [Biaka Pygmy]	YA003932
Bahrain	YA004278
Beirut, Lebanon [Lebanese]	YA003859
Bosnia and Herzegovina [Bosnian]	YA003787
Bulgaria [Bulgarian]	YA004094
Cameroon [Cameroonian]	YA004669
Central Anatolia, Turkey [Turkish]	YA004116
China [Han]	YA004092
Croatia [Croatian]	YA003894
Egypt [Northern Egyptian, Bahariya Egyptian]	YA004355
Egypt [Siwa Berber]	YA004356
Eskikoy, Central Anatolia, Turkey [Turkish]	YA003467
Ethiopia [Ethiopian_Amhara, Tigray, Other]	YA004203
Ethiopia [Ethiopian_Jews, Oromo, Somali]	YA004202
Ethiopia [Jewish]	YA003941
Iran [Iranian]	YA004237
Iraq [Iraqi]	YA003858
Israel & Palestinian Authority Area [Arab]	YA003643
Israel & Palestinian Authority Area [Samaritan]	YA003944
Italy [Italian]	YA003983
Ituri, Democratic Republic of the Congo [Mbuti Pygmy]	YA003945
Jordan [Arab-Adnanit]	YA003522
Jordan [Arab-Qahtanit]	YA003523
Ljubljana, Slovenia [Slovenian]	YA003086
Mediterranean Region, Turkey [Turkish]	YA004120
Northern Iraq, Iraq [Syriac]	YA004214
Northern Iraq, Iraq [Turkmen]	YA004215
Northern Israel, Israel [Druze]	YA003952
Romania [Romani]	YA004101
Romania [Romanian]	YA003148
Russian Federation [Russian]	YA004184
Sanaa, Yemen [Yemeni]	YA003764
Serbia [Serbian]	YA004149
Southeastern Anatolia, Turkey [Turkish]	YA004118
Southern Ural, Russian Federation [Chuvash]	YA003960
Tripoli, Libya [Libyan]	YA003752
Turkey [Turkish]	YA002964
Ulaanbaatar, Mongolia [Mongolian]	YA004127
Yemen [Yemenite Jews]	YA003972
